# Supplementary material for: Study protocol for an international prospective non-randomized trial evaluating the long term outcomes of Sutureless Aortic Valve Replacement Versus Stented Aortic Valve Replacement for Aortic-Valve Stenosis in Patients at Risk to Severe Valve Obstruction: The SAVI-AVR trial
Source: Research Square preprint supplement (doi:10.21203/rs.3.rs-6251208/v1), 2025-05-08
Supplement: Supplementary file 1 [file 269b239c568dcd9a2de5785d.docx]

| **Table 10 Adverse Event** |
| --- |
| - **Serious Adverse Event (SAE)**   An adverse event is deemed to be serious if the event are associated with   - Death - Serious health deterioration in the study patient, including life-threatening illness or injury, permanent impairment to body structure or function, prolonged hospitalisation, or the need for medical or surgical intervention to prevent permanent impairment to body structure or function. - Fetal distress, fetal death, congenital abnormality or birth defect - Medically significant incident   Serious medical events not meeting the above criteria may still be SAEs if they endanger the patient and require immediate medical or surgical intervention to prevent one of the above outcomes.  Pre-existing medical conditions or symptoms reported before enrolment will not be recorded as an AE. Record an AE if the pre-existing condition or symptoms worsen due to the device, or if study symptoms are due to the device or trial-related procedure. Do not record death as an AE, but only as a consequence of another specific AE. |
| - **Anticipated Adverse Events**   Anticipated adverse events (AEs) are defined as such events which have been identified as potentially occurring in connection with the investigational device or implant procedure. |
| - **Unanticipated Adverse Device Effect**   An Unanticipated Adverse Device Effect (UADE) is defined as any serious adverse effect on health or safety, or any life-threatening issue or fatality, caused by, or associated with, a device, if that effect, problem, or death was not previously identified in the investigational plan or application (including a subsidiary plan or additional application), or any other unanticipated serious issue related to the rights, safety, or welfare of subjects.  It is imperative that all UADEs are reported to CEC without delay. Completion of the AE Form of the CEC is also mandatory for all UADEs. In addition, the Investigator is obliged to inform his/her EC/IRB of all UADEs occurring at his/her site no later than 10 days after the Investigator first becomes aware of the effect (and any additional information as required by EC/IRB or local regulations).  All AEs associated with UADEs are subject to close monitoring until either resolution or a stable clinical endpoint is achieved. Essential treatments and outcomes must be documented. |

Abbreviations are shown in the table and in the text
