# Supplementary material for: Study protocol for an international prospective non-randomized trial evaluating the long term outcomes of Sutureless Aortic Valve Replacement Versus Stented Aortic Valve Replacement for Aortic-Valve Stenosis in Patients at Risk to Severe Valve Obstruction: The SAVI-AVR trial
Source: Research Square preprint supplement (doi:10.21203/rs.3.rs-6251208/v1), 2025-05-08
Supplement: Supplementary file 2 [file 37b75e54ca1687516fd42e3f.docx]

| **Supplementary Table 5** Criteria for defining postoperative acute kidney injury† [32,33] | |
| --- | --- |
| **Level** | **Creatinine in serum** |
| 1 | Increase of 1.5-1.9 times the baseline  or an increase of at least 0.3 mg/dL (26.5 micromol/L). |
| 2 | 2 to 2.9 times the baseline. |
| 3 | Increase to 3.0 times the baseline  or to 4 mg/dL (353.6 micromol/L) or  initiation of renal replacement therapy. |

† Serum creatinine level changes during hospitalization
