# Supplementary material for: Study protocol for an international prospective non-randomized trial evaluating the long term outcomes of Sutureless Aortic Valve Replacement Versus Stented Aortic Valve Replacement for Aortic-Valve Stenosis in Patients at Risk to Severe Valve Obstruction: The SAVI-AVR trial
Source: Research Square preprint supplement (doi:10.21203/rs.3.rs-6251208/v1), 2025-05-08
Supplement: Supplementary file 3 [file 4ae319eec5856034450d2466.docx]

| BOX 1 Participating centres |
| --- |
| 1. Centre Cardiologique du Nord, Saint Denis, France. 2. Hôpital Henri Mondor, Assistance Publique—Hôpitaux de Paris, Créteil, France. 3. University of Genoa- UniGe, Genoa, Italy. |
