# Supplementary material for: Study protocol for an international prospective non-randomized trial evaluating the long term outcomes of Sutureless Aortic Valve Replacement Versus Stented Aortic Valve Replacement for Aortic-Valve Stenosis in Patients at Risk to Severe Valve Obstruction: The SAVI-AVR trial
Source: Research Square preprint supplement (doi:10.21203/rs.3.rs-6251208/v1), 2025-05-08
Supplement: Supplementary file 5 [file 5952b4f5abfa175bd3097626.docx]

| **Supplementary Table 3** Classification for perioperative bleeding in simplified E-CABG [26-28] | |
| --- | --- |
| **Grades** | **Treatment for Bleeding** |
| Grade 0 | Only administer one unit of RBCs or avoid transfusion altogether. |
| Grade 1 | Transfusion of 2-4 units of RBCs. |
| Grade 2 | Transfusion of 5-10 units of RBCs and/or reoperation may be necessary to address intrathoracic bleeding. |
| Grade 3 | Transfusion of more than 10 units of RBCs |
