# Supplementary material for: Study protocol for an international prospective non-randomized trial evaluating the long term outcomes of Sutureless Aortic Valve Replacement Versus Stented Aortic Valve Replacement for Aortic-Valve Stenosis in Patients at Risk to Severe Valve Obstruction: The SAVI-AVR trial
Source: Research Square preprint supplement (doi:10.21203/rs.3.rs-6251208/v1), 2025-05-08
Supplement: Supplementary file 6 [file 596e9a72e74831e7fc879438.docx]

**S1- Mechanical intervention performed in group patient**

Patients will be enrolled in either of the following two surgical procedures: The two surgical procedures to which patients will be enrolled are as follows:

(a) Stented aortic valve replacement (St-AVR) with a commercial bioprosthesis (BP), involving the use of a conventional stented Carpentier Edwards (CE) Perimount Magna Ease (CEPME) pericardial BP; or

(b) A rapid deployment, sutureless aortic valve implant (Su-AVI), involving the use of a Perceval sutureless prosthesis (LivaNova plc, UK).

- ***Standard Aortic Valve Procedure***

Following the induction of anaesthesia, patients will undergo trans-oesophageal echocardiography (TEE) and pulmonary artery catheterisation in accordance with the centre's preference and cardiothoracic anaesthesia protocol. Central haemodynamics will be recorded, and TEE will be performed under loading conditions as close as possible to the patient's baseline. The intra-operative TEEs will be performed in a manner consistent with a standardised set of operating procedures, as outlined in the echo protocol appendix. The protocol will be made duly accessible to the respective sites and will be attached to the echo machine in the operating theatre. Maintaining adequate blood pressure and pulmonary artery pressure is essential to prevent the occurrence of anaesthetic effects, and this can be achieved using phenylephrine or 2,6-diisopropylphenol, as well as by ensuring adequate volume, during transesophageal echocardiogram (TEE) evaluations. Furthermore, observations have indicated that amongst those patients who have undergone AVR with the use of St-AV or Su-AV, confirmation of the absence of bicuspid aortic valve morphology and severe ascending aorta calcification (porcelain aorta lesion) has been demonstrated. The surgical procedures performed in this context are dictated by the institutional protocols in place, with the choice of approach being determined by either a full sternotomy or a partial sternotomy. The utilisation of cardiopulmonary bypass is a universal aspect of the surgical procedure. The use of single venous or double cannulation is a prevalent approach, and the employment of a vent system is utilised to extract air from the ventricle via a cannula. The selection of cardioplegia, either antegrade or retrograde, is a decision made by the surgeon at their discretion, as is the performance of coronary artery bypass grafting. Subsequently, the surgeon will assess the adequacy of the revascularization. In regard to the aortic valve, the approach may be either above, in which case the sutureless valve with its stent can be inserted more easily, or below, in cases where a xenograft is being transplanted. Inspection of the aortic valve is a prerequisite to verify the absence of any pre-existing organic pathology, such as endocarditis.

- ***Su-AVI***

The Perceval aortic valve (LivaNova, London, United Kingdom) represents a significant development in cardiovascular medicine. This self-anchoring, sutureless, and bio-prosthetic valve is composed of bovine pericardial leaflets encased within a self-expanding nitinol alloy cage. The inflow ring, constructed from a double layer of bovine pericardium, adheres to the native annulus, and a supraannular cuff serves to prevent paravalvular leak (PVL). Three eyelets affixed to the inflow ring facilitate the guidance of sutures, thereby ensuring the delivery of the valve to an intraannular position. The self-expanding configuration deploys radial force to secure the inflow ring, while the nitinol cage adapts to the sinuses of Valsalva [1-5] . **Supplementary Figure 1**

- **Technique**
- Aortotomy

To achieve the requisite height for cage insertion, and to facilitate closure of the aorta, it is necessary to carry out an additional aortotomy. A transverse aortotomy is advocated for this purpose, to be carried out 3.5 centimetres above the annulus, or alternatively 0.5 centimetres above the sinotubular junction (STJ), with the objective of approximating the epiaortic fat pad. In cases where native valve exposure has been undertaken, it is imperative that commissural traction sutures are removed prior to the deployment of Perceval valves. This precautionary step is necessary as the presence of these sutures has the potential to distort the annulus. In cases in which the aortotomy is at a lower level, care should be taken to avoid inadvertent entrapment of the outflow ring during suture closure. Such negligence has the potential to result in the displacement of the valve, which, when coupled with the process of heart-filling with blood during the subsequent cardiac phase, can lead to intimal tears.

- Sizing

In order to ensure an optimal outcome, particular attention is required in order to correctly size the object in question. It is imperative that the transparent sizer passes freely through the anulus, while the white sizer must encounter significant resistance to avoid failure. Incorrect sizing can lead to a variety of complications, including PVL secondary to inadequate annular sealing, central leaks due to failure of central leaflet coaptation, and late proximal misplacement [5-6]. An additional common error is oversizing the cage, which can impede its expansion and result in infolding of the cage, PVL, high gradients, or supraannular migration [7].This can lead to a variety of complications, including PVL secondary to inadequate annular sealing, central leaks due to failure of central leaflet coaptation, and late proximal misplacement. The occurrence of complications due to oversizing is, consequently, more likely and in clear cases it is advisable to choose the smaller valve. However, when the native annulus is larger than the dimensions of the largest Perceval valve (XL), the use of a conventional stented bio-prosthesis is recommended.

- Deployment

The implementation of temporary guiding sutures within the annulus, at the nadir of each sinus, constitutes a fundamental step in the surgical procedure. Following this initial step, the guiding sutures are meticulously passed through the eyelets of the valve. The deployment phase is characterised by the paramount importance of the application of continuous traction in ensuring the successful deployment of the valve. The initial step of this procedure is the placement of temporary anchoring sutures within the annulus, situated at the nadir of each sinus. These sutures are then meticulously passed through the eyelets of the valve [1-5]. During the deployment phase, the application of continuous traction is paramount to ensure the precise positioning of the valve at the intended height. Due to its lower position, the non-coronary sinus is tilted towards the operator. This results in the valve holder being aligned with the left ventricular outflow tract (LVOT), perpendicular to the annulus. Post-deployment ballooning of the valve is a prerequisite for the inflow ring to conform to the annulus. The operator must then undertake a visual confirmation of the positioning, alignment, leaflet symmetry, coaptation, and patency of the coronary ostia. If the annulus is visible above or below the valve, this indicates that the height of deployment is incorrect. The commisures will be visible above the valve, but the annulus should not be visible. The use of forceps is then recommended to open the leaflets, thus confirming the absence of the annulus beneath the inflow ring. A circumferential inspection of the prosthesis-tissue interface is indicated for the purpose of detecting PVL. Although not officially endorsed, the explantation, recollapse and redeployment of the valve remains a viable option should the necessity arise [1,8]. The explantation procedure is initiated by the grasping of the commissural struts located on either side with forceps, and the subsequent application of upward traction. It is crucial to emphasise that excessive manipulation of the heart may result in the dislodgement of the valve following deployment. As such, in combined surgical procedures, the implantation should be performed as a final step and vigorous manoeuvres for the removal of air should be refrained from.

- **Potential risks associated with the procedures.**

Su-AVI carries with it a certain degree of potential risk. The inherent risks of the overall procedures themselves include complications associated with SAVR and general anaesthesia. In addition to these risks, there are risks unique to the use of the study valve and its delivery systems.

It is imperative to adhere to the stipulated guidelines outlined in the Instructions for Use (IFU) and training manual when handling products and undertaking implant procedures. The objective here is to mitigate the risks associated with device utilisation. In addition, there is an undertaking to mitigate such risks by means of the meticulous selection of sites and investigators, together with their effective management. The selection of sites and investigators is initially determined by a set of predetermined criteria, with the objective of guaranteeing that the study personnel and their respective institutions possess the requisite qualifications to screen, perform and manage study procedures, in addition to providing support for the associated research requirements. The second element to be considered is the design of the trial management structure. The establishment of this structure is intended to ensure the implementation of a rigorous oversight framework for trial activities, encompassing the meticulous supervision of site and personnel performance. Additionally, this framework is designed to facilitate the dissemination of best practices among investigators and study personnel through various mechanisms, including investigator meetings, ongoing educational initiatives, and case reviews.

- ***Coronary Artery Bypass Grafting (CABG)***

Standard techniques will be employed to perform coronary artery bypass grafting with two-stage venous cannulation. The left internal thoracic artery (LITA) is recommended for left ascending anterior (LAD) grafts; however, the methods for selecting and harvesting conduits will not be prescribed. The specific technical details of bypass grafting will not be specified. The surgical investigator will perform complete revascularization based on their own judgment.

- **Structural/Non Structural Valve Degeneration**

Bioprostheses are susceptible to structural valve degeneration (SVD), leading to diminished long-term functionality. SVD manifests predominantly as leaflet calcification, precipitating stenosis. However, it may also manifest as leaflet flail or tear, resulting in regurgitation. Risk factors for early SVD include patient age, renal failure, abnormal calcium metabolism and mismatch between the implanted valve and the patient [9,10].

According to the American Society of Echocardiography's 2009 guidelines on the evaluation of bioprosthetic aortic valves, the term "possible stenosis" is defined as follows [11] : peak prosthetic aortic jet velocity of 3 to 4 m/s, mean gradient of 20 to 35 mmHg, and an effective orifice area of 0.8 to 1.2 cm². As outlined in the 2009 recommendations by the American Society of Echocardiography for the evaluation of bioprosthetic aortic valves, significant stenosis is defined as follows: peak prosthetic aortic jet velocity of >4 m/s; mean gradient of >35 mm Hg; and, finally, effective orifice area of <0.8 cm².

The VARC-3 [12] recommendations stipulate the following definitions for SVD and nonstructural valve degeneration NSVD related to aortic bioprosthetic valve dysfunction:

- -SVD is defined as permanent changes to the prosthetic valve, which may take the form of wear and tear, leaflet disruption, flail leaflet, leaflet fibrosis and/or calcification. Other possible causes of SVD include strut fracture and deformation.
- Nonstructural valve degeneration (NSVD) is defined as any abnormality intrinsic to the prosthetic valve that results in valve dysfunction. Examples include residual intra- or para-prosthetic aortic regurgitation; leaflet entrapment by pannus, tissue, or suture; inappropriate positioning or sizing; dilatation of the aortic root after stentless prostheses or aortic valve sparing operations; prosthesis-patient mismatch; and embolization.

The European Association for Cardiovascular Imaging proposes the incorporation of an increase in mean gradient at follow-up, in cases where obstruction is indicated by an increase in mean gradient of 10–19 mmHg during follow-up and significant obstruction with an increase ≥20 mm Hg. 9 More recently, a consensus statement from the European Association of Percutaneous Cardiovascular Interventions suggests a distinction between hemodynamic and morphological SVD [13].

- **Structural Valve Degeneration**

SVD is defined by the deterioration of the leaflets or supporting structures of a bioprosthetic valve, resulting in thickening, calcification, tearing or disruption of the prosthetic valve materials. This ultimately leads to valve hemodynamic dysfunction, which is characterised by stenosis or regurgitation. Despite there being a paucity of research in this area, current hypotheses for the etiology of the condition include the following: the occurrence of tissue disruption or thickening over time due to mechanical stress in combination with abnormal flow shear stresses at the valve leaflet surface; the disruption of collagen fibres; and tissue calcification. The definition of SVD excludes other clinical valve disorders that are not due to valve tissue deterioration. These encompass patient-prosthesis mismatch, device malposition, paravalvular regurgitation and abnormal frame expansion, although these may be associated with early SVD. A particularly salient challenge pertains to the distinction between patient-prosthesis mismatch (PPM) and SVD. The principle caveat is that PPM should not be categorised as SVD, unless the leaflet morphology is deemed normal. This is notwithstanding the relatively diminutive valve area and elevated gradient. Furthermore, in instances where patient-prosthesis compatibility issues are encountered, dysfunctional valve haemodynamics become evident at the time of prosthesis implantation. In contrast to SVD and associated acquired stenosis, there is no deterioration in haemodynamics (i.e. increase in gradients and decrease in valve area) during follow-up. Furthermore, prosthetic valve thrombosis and infective endocarditis are not categorised as SVD [12-14].

Nonetheless, it is vital to recognise that while complications may be effectively addressed, they nevertheless have the potential to result in SVD. This underscores the necessity for comprehensive management strategies. The staging of SVD is predicated on the status of the implanted valve rather than the patient's clinical condition. Consequently, while the presence or severity of symptoms and the necessity for reintervention are concomitant with the pathological condition of the implanted valve, they are not incorporated within our recommendations for the staging of SVD. [10-14]

Concerns have recently been raised regarding the occurrence of bioprosthetic valve thrombosis (BVT) and its potential association with subsequent structural heart disease (SHD) [15]. Recent studies employing advanced imaging techniques, including 4-dimensional computed tomography (4DCT) with high-speed scanners, have documented leaflet immobility, thickness, and thrombosis both early and late following both SAVR and TAVI procedures [16].

Furthermore, it should be noted that not all immobile bioprosthetic valve cusps are thrombosed; reduced cusp mobility can also result from valve deformation and unusual tensile forces on the prosthetic cusps[17]. The true incidence and clinical relevance of these different findings are as yet unknown, but it is important to consider them in future research. It is evident that the phenomenon is more prevalent than was previously recognised [18]. A recent study has indicated that the risk of leaflet thickening following TAVI is greater than that following SAVR, which may consequently lead to an earlier onset of risk of SVD after TAVI [19].

As demonstrated **supplementary figure 2**, the classification of SVD is illustrated based on the findings of the echocardiographic assessment from Dvir and Bourgouignon

- **Other therapeutics**
- ***GDMT***

Coronary artery disease, mitral valve regurgitation, and any other concomitant conditions should be treated according to the prevailing medical guidelines. This may entail the administration of beta-blocker therapy, angiotensin-converting enzyme (ACE) inhibitors or angiotensin receptor blockers (ARBs), platelet aggregation inhibitors, statin therapy, aldosterone antagonists, implantable cardiac defibrillators, and cardiac resynchronisation therapy when deemed clinically appropriate and well-tolerated. The guidelines for medical management will be subject to regular review and updated by a clinical management committee by each heart team [20,21].

- **Managing Postoperative Atrial Fibrillation (AF)**

Post-operative atrial fibrillation (AF) will be evaluated in accordance with the following criteria.To regulate the ventricular response rate in patients experiencing postoperative AF, beta-blockers are recommended as the initial treatment option to control the rate. In instances where beta-blockers are contraindicated, nondihydropyridine calcium channel blockers should be employed as the secondary treatment option. The assessment of post-operative AF will be determined by the aforementioned criteria. In order to control the ventricular response rate in cases of post-operative AF, beta-blockers are recommended as the primary agent for rate control. If beta-blockers are contraindicated, then non-dihydropyridine calcium channel blockers should be used as the secondary agent.

In patients with coronary artery disease who do not have congestive heart failure, the conversion to normal sinus rhythm can be achieved with Sotalol or Class 1A antiarrhythmic drugs. For patients with depressed left ventricular function, amiodarone therapy is recommended. If post-operative AF persists or recurs for more than 24 hours, then anticoagulation with warfarin is advised for a period of 4 to 8 weeks, or at least 30 days after the restoration of sinus rhythm. To mitigate the occurrence of AF, the administration of beta-blockers prior to or during the early postoperative period is strongly recommended, unless there are contraindications.In patients unable to tolerate beta-blockers, preoperative administration of amiodarone has been observed to reduce the incidence of postoperative AF[22,23]

**S2- Clinical Centers**

This study will be conducted at each of the three clinical centres participating in the SAVI-AVR Protocol trial. Each clinical centre shall be responsible for promptly obtaining approval from the relevant institutional review board (IRB) for the protocol and informed consent, including any amendments. Furthermore, these centres shall be accountable for patient enrolment, accurate data collection and subsequent entry into an electronic data capture system (Microsoft Access datasheet; Redmond, Washington, USA). The coordinating centre will be the Centre Cardiologique du Nord in France. This centre will serve as the NCT on **Clinical Trial Gov. Com. (ID: NCT05261204) and as the IRB (ID : 2022011057)** as the primary trial centre.

- 1. **Study procedure**
- ***Screening Phase***

The screening stage is conceptualised with two overarching aims: first, to obtain patient consent, and secondly, to ascertain their compatibility for participation in the study. The subsequent step involves submitting the presentation for case scrutiny for the Heart Teen scared decision making. Scheduling of screening procedures is to take place within 30 days prior to valve implant procedure, unless specified otherwise in the subsequent sections.

Patients who provide their consent will be entered into the electronic database (EDC) and assigned a unique subject identifier. The patient's status will be designated as 'Discontinued' in the event that the patient withdraws consent prior to or following the conclusion of the case discussion and upon initiation of all screening procedures (which include the case discussion call) and subsequent non-approval of the case discussion by the heart team.

The following information will be gathered during the screening process:

- **Operability**

The operability of the subject is to be assessed by determining the STS Risk Score, Logistic EuroSCORE and EuroSCORE II. The calculation of Logistic EuroSCORE will be conducted using the following reference: <http://www.euroscore.org/calcold.html>. Similarly, the calculation of EuroSCORE II will be conducted using the following reference: <http://www.euroscore.org/calc.html>.

- ***Verification of Eligibility***
- **Informed Consent**

The study's investigator(s) and support staff will approach patients suffering from symptomatic, severe AVS to ascertain their interest in participating in the study. They will provide an overview of the study, including the background, risks, benefits and study procedures. If patients are interested in participating in the study, including the CT sub-study, if applicable, they will be required to sign the Institutional Review Board (IRB)-approved informed consent form prior to undergoing any study-specific procedures. Upon completion of the requisite formalities, patients who have consented to participate in the study will be entered into the study's electronic database (EDC). This will be meticulously compiled in a Microsoft Access datasheet (Redmond, Washington, USA).

- **Case Examination Committee**

The Case Examination Committee (CEC) constitutes a select review committee comprising investigators participating in the trial. The function of the Case Examination Committee is to undertake a thorough evaluation of cases referred to it in order to determine the patient's suitability for participation in the trial. This is achieved by focusing on confirming patient eligibility, as well as assessing the patient's surgical risk, valve size, appropriate vascular access and any other relevant clinical factors that could affect their participation in the trial and, ultimately, their eligibility.

Before a case is submitted for review, the principal investigator and the and Heart Team will assess the patient for surgical risk and basic eligibility criteria. It is required that at least one site investigator personally examines the patient to determine surgical risk. Once the patient has been fully screened and approved, the site will submit the case for review and approval by the Case Review Committee. Once a case is approved by the Case Review Committee, the patient is eligible for enrolment and valve implantation.

- **Enrollement**

Patients are deemed eligible for enrolment once all preliminary screening procedures have been completed, all relevant inclusion and exclusion criteria have been confirmed, and a comprehensive case review has been conducted and approved. The process of recruitment is conducted on a centralised basis, with the unified management of all pertinent aspects of the procedure overseen by designated authorities. The registration of subjects is initiated upon entry into the electronic system by the designated site, which subsequently receives the designated treatment assignment (Su-AVI or St-AVR). The moment the assignment has been issued, and the subject is informed of the treatment assigned to them, the subject is then deemed to have enrolled in the trial. The intent-to-treat (ITT) population comprises all recruited patients.

Patients who have been recruited are considered to be enrolled in the trial. Patients are considered to have withdrawn from the study if they were prospectively assigned to an ITT cohort and withdrew consent prior to the valve procedure. All assessments and the reason for withdrawal are recorded in the EDC. Patients who have been enrolled in the Su-AVI procedure but have subsequently undergone St-AVR will remain in the study and undertake all subsequent study visits. The rationale for the conversion from Su-AVI to St-AVR will be documented in the EDC. In instances where a subject is no longer traceable or withdraws prematurely, the CEC may undertake a search of the Social Security Death Index and/or other death registries. Should the patient be confirmed as deceased, the CEC may elect to convene a discussion with the heart team.

- **Delineation of the investigator's profile, skills and expertise.**

All surgeons, cardiologists, coordinators and other investigators participating in the study are obliged to complete the Investigator Profile form. This form must include their hospital affiliation, address, telephone number, facsimile machine number, and email address. Moreover, surgeons, cardiologists, and coordinators are required to submit their Conflict of Interest Statements and Financial Disclosure Certifications via email. Finally, a qualified administrative health professional will be authorised to assist the aforementioned medical practitioners in carrying out the study.

The clinical investigators for this trial are cardiothoracic surgeons and interventional cardiologists who specialise in surgical repair of the mitral valve and transcatheter valve procedures, and who are experienced in the management of patients with ischemic and valvular heart disease. Specifically, to be eligible to participate in the study as a surgeon, candidates are required to have performed a minimum of 30 aortic valve procedures per year, averaged over a 2-year period. Interventional cardiologists, meanwhile, are required to have undergone specific training in the use of transcatheter therapies on new platforms for the treatment of structural heart valve disease.

- **Conflict of Interest and Financial Disclosure Statement**

This statement is designed to confirm that all investigators involved in this trial have no conflicts of interest with any institution that could potentially influence their participation. Each investigator is required to provide this statement and submit a financial disclosure agreement.

- **Patient privacy**

In accordance with the Health Insurance Portability and Accountability Act (HIPAA) guidelines, patient records will be maintained in a confidential manner (https://www.hhs.gov/hipaa/index.html). Subject documentation may be reviewed by study investigators, site Institutional Review Boards (IRBs), or single centre authorization by local ethics committee. However, it is imperative to note that all unique patient and hospital identifiers will be systematically removed. Aggregate data from this study may be disseminated in accordance with the publication policy documented in the trial agreements. It is, however, imperative to note that data containing patient identifiers will not be published. Subsequent to the inclusion of data, the statistician overseeing the analysis will meticulously examine both the original ACCESS datasheet and the extracted Excel datasheet (Redmond, Washington, USA). Thereafter, he or she will liaise with the principal investigators of each participating centre to ensure the preservation of confidentiality. A unified database will be employed for the final analysis.

- **S3-Sub-study of the CT imaging**

Sites that possess the capacity to execute high-fidelity 3D scans will be selected to partake in a CT sub-study. All individuals enrolled in the CT subsample are required to meet the previously delineated inclusion criteria. Concomitant with the previously delineated exclusionary standards, subjects will be disqualified from participating in the sub-study if they exhibit or have exhibited a medical condition necessitating or intended to be followed by medication that modifies their coagulative state, specifically following the valve implantation procedure.

According to the findings of the survey conducted at the three clinical centers participating in this study, it is estimated that the total number of patients to be evaluated will amount to 1.020. This estimate is derived from the data bases of the aforementioned three clinical centers . Patients will be the subject of ongoing surveillance through the implementation of a multifaceted monitoring strategy. The strategy will include, but not be limited to, direct communication via mail to referring physicians of patients receiving procedures, on-site verification at the center where the patient underwent surgery, and telephone calls to healthcare facilities where patients were subsequently readmitted due to adverse events (AEs). The study centers will undertake periodic reviews of the inclusions against the predetermined criteria. A central feature of the screening protocol was the systematic documentation of patients who underwent various procedures, accompanied by echocardiographic and clinical follow-up assessments, ensuring comprehensive monitoring throughout the study. The database is a repository of information concerning the participation of women and minorities in clinical studies, a matter of significant concern for scientific, ethical, and social reasons, as well as for the generalisability of study results. SAVI-AVR is dedicated to the pursuit of scientific results while ensuring balanced recruitment of patients, irrespective of gender or ethnicity.

**Legend.**

**Supplementary Figure 1.**  Perceval Sutureless is based on rapid-deployment techniques.

**Supplementary Figure 2**. Classification of SVD based on recommendations of VIVID (Valve in Valve International Data) Investigators. The useful elements to define SVD as valve-related dysfunction were the mean aortic gradient ≥20 mm Hg, the effective orifice area ≤0.9-1.1 cm2, a dimensionless valve index <0.35 m / s and moderate or severe prosthetic regurgitation. Phase 0 displays the absence of morphological leaflet anomaly and absence of hemodynamic alter. Phase 1 discloses early morphological changes without hemodynamic compromise. The morphological alterations typical of stage 1 are also referable to prostheses where the degenerative process is controlled using antithrombotic drugs that reduce the thickening of the leaflet. Phase 2 reveals morphological abnormalities of valve leaflets of SVD associated with hemodynamic dysfunction. The bioprostheses in this phase can manifest as stenosis or regurgitation. The thrombosis is a factor favoring phase 2 leading the stenosis or paravalvular leakage and regurgitation. Phase 2 includes two subcategories, phase 2S and phase 2R. In the evolutive stage of 2S degenerative an increase in the mean transvalvular gradient (≥10 mm Hg) and decrease in the valvular area without leaflet thickening occur. SVD may occur as 2RS form including moderate stenosis and moderate regurgitation. Phase 3 of SVD highlights severe stenosis or severe regurgitation with severe hemodynamic change.Abbreviations: R, regurgitation; SVR, structural valve degeneration; S, stenosis; VARC, Valve Academy Research Consortium

**Reference**

1. Spadaccio C, Nenna A, Pisani A, Laskawski G, Nappi F, Moon MR, Biancari F, Jassar AS, Greason KL, Shrestha ML, Bonaros N, Rose D. [Sutureless Valves, a "Wireless" Option for Patients With Aortic Valve Disease : JACC State-of-the-Art Review.](https://pubmed.ncbi.nlm.nih.gov/39019533/) J Am Coll Cardiol. 2024 Jul 23 ;84(4):382-407
2. Pfeiffer S, Fischlein T, Santarpino G. Sutureless Sorin Perceval aortic valve implantation. SeminThorac Cardiovasc Surg. 2017;29:1-7
3. Fischlein T, Meuris B, Hakim-Meibodi K, et al. The sutureless aortic valve at 1 year: a large multicenter cohort study.J Thorac Cardiovasc Surg 2016;151:1617–26.e4
4. LivaNova group. Perceval Implant Key Points. REF. FSCAHV-2016-001. Available at <https://www.hpra.ie/docs/defaultsource/field-safety-notices/august-2016/v29102_fsn.pdf>? sfvrsn=2. Accessed February 23, 2025.
5. Powell R, Pelletier MP, Chu MWA, et al. The Perceval sutureless aortic valve: review of outcomes, complications, and future direction. Innovations (Phila) 2017;12:155–73.
6. Amr G, Ghoneim A, Giraldeau G. First case of a sutureless Perceval valve delayed proximal migration. J Thorac Cardiovasc Surg 2017;153:e21–3.
7. Baert J, Astarci P, Noirhomme P, et al. The risk of oversizing with sutureless bioprosthesis in small aortic annulus. J Thorac Cardiovasc Surg 2017;153:270–2.
8. Santarpino G, Pfeiffer S, Concistre G, et al. A supra-annular malposition of the Perceval S sutureless aortic valve: the ‘χ-movement’ removal technique and subsequent reimplantation. Interact Cardiovasc Thorac Surg 2012;15:280–1.
9. Attias D, Nejjari M, Nappi F et al. How to treat severe symptomatic structural valve deterioration of aortic surgical bioprosthesis: transcatheter valve-in-valve implantation or redo valve surgery? 2018 Dec 1 ;54(6) :977-985.
10. Côté N, Pibarot P, Clavel MA. Incidence, risk factors, clinical impact, and management of bioprosthesis structural valve degeneration. Curr Opin Cardiol. 2017;32:123–129.
11. Zoghbi WA, Chambers JB, Dumesnil JG, Foster E, Gottdiener JS, Grayburn PA, Khandheria BK, Levine RA, Marx GR, Miller FA Jr, Nakatani S, Quiñones MA, Rakowski H, Rodriguez LL, Swaminathan M, Waggoner AD, Weissman NJ, Zabalgoitia M; American Society of Echocardiography’s; Guidelines and Standards Committee; Task Force on Prosthetic Valves; American College of Cardiology Cardiovascular Imaging Committee; Cardiac Imaging Committee of the American Heart Association; European Association of Echocardiography; European Society of Cardiology; Japanese Society of Echocardiography; Canadian Society of Echocardiography; American College of Cardiology Foundation; American Heart Association; European Association of Echocardiography; European Society of Cardiology; Japanese Society of Echocardiography; Canadian Society of Echocardiography. Recommendations for evaluation of prosthetic valves with echocardiography and doppler ultrasound: a report From the American Society of Echocardiography’s Guidelines and Standards Committee and the Task Force on Prosthetic Valves, developed in conjunction with the American College of Cardiology Cardiovascular Imaging Committee, Cardiac Imaging Committee of the American Heart Association, the European Association of Echocardiography, a registered branch of the European Society of Cardiology, the Japanese Society of Echocardiography and the Canadian Society of Echocardiography, endorsed by the American College of Cardiology Foundation, American Heart Association, European Association of Echocardiography, a registered branch of the European Society of Cardiology, the Japanese Society of Echocardiography, and Canadian Society of Echocardiography. J Am Soc Echocardiogr. 2009;22:975–1014.
12. VARC 3
13. Capodanno D, Petronio AS, Prendergast B, Eltchaninoff H, Vahanian A, Modine T, Lancellotti P, Sondergaard L, Ludman PF, Tamburino C, Piazza N, Hancock J, Mehilli J, Byrne RA, Baumbach A, Kappetein AP, Windecker S, Bax J, Haude M. Standardized definitions of structural deterioration and valve failure in assessing long-term durability of transcatheter and surgical aortic bioprosthetic valves: a consensus statement from the European Association of Percutaneous Cardiovascular Interventions (EAPCI) endorsed by the European Society of Cardiology (ESC) and the European Association for Cardio-Thoracic Surgery (EACTS). Eur J Cardiothorac Surg. 2017;52:408–417. D
14. Dvir D, Bourguignon T, Otto CM, Hahn RT, Rosenhek R, Webb JG, Treede H, Sarano ME, Feldman T, Wijeysundera HC, Topilsky Y, Aupart M, Reardon MJ, Mackensen GB, Szeto WY, et al; VIVID (Valve in Valve International Data) Investigators. [Standardized Definition of Structural Valve Degeneration for Surgical and Transcatheter Bioprosthetic Aortic Valves.](https://pubmed.ncbi.nlm.nih.gov/29358344/) Circulation. 2018 Jan 23;137(4):388-399.
15. Egbe AC, Pislaru SV, Pellikka PA, Poterucha JT, Schaff HV, Maleszewski JJ, Connolly HM. Bioprosthetic valve thrombosis versus structural failure: clinical and echocardiographic predictors. J Am Coll Cardiol. 2015;66:2285–2294. D
16. Makkar RR, Fontana G, Jilaihawi H, Chakravarty T, Kofoed KF, De Backer O, Asch FM, Ruiz CE, Olsen NT, Trento A, Friedman J, Berman D, Cheng W, Kashif M, Jelnin V, Kliger CA, Guo H, Pichard AD, Weissman NJ, Kapadia S, Manasse E, Bhatt DL, Leon MB, Søndergaard L. Possible subclinical leaflet thrombosis in bioprosthetic aortic valves. N Engl J Med. 2015;373:2015–2024
17. Waterbury TM, Raphael CE, Padang R, Eleid MF, Holmes DR Jr, Rihal CS, Pislaru SV. Not all immobile bioprosthetic valve cusps are thrombosed. JACC Cardiovasc Interv. 2017;10:e117–e118.
18. Egbe AC, Connolly HM, Schaff HV. Bioprosthetic valve thrombosis: what we know and what we need to know. J Thorac Cardiovasc Surg. 2016;152:975–978
19. Chakravarty T, Søndergaard L, Friedman J, De Backer O, Berman D, Kofoed KF, Jilaihawi H, Shiota T, Abramowitz Y, Jørgensen TH, Rami T, Israr S, Fontana G, de Knegt M, Fuchs A, Lyden P, Trento A, Bhatt DL, Leon MB, Makkar RR; RESOLVE; SAVORY Investigators. Subclinical leaflet thrombosis in surgical and transcatheter bioprosthetic aortic valves: an observational study. Lancet. 2017;389:2383–2392.
20. Vahanian A, Beyersdorf F, Praz F, Milojevic M, Baldus S, Bauersachs J,*et al*. 2021 ESC/EACTS Guidelines for the management of valvular heart disease. ESC/EACTS Scientific Document Group; ESC National Cardiac Societies. European Heart Journal. 2022; 43: 561–632.
21. Otto CM, Nishimura RA , Bonow RO, Carabello BA, ErwinJ P, Gentile F, *et al*. 2020 ACC/AHA Guideline for the Management of Patients with Valvular Heart Disease: Executive Summary: a Report of the American College of Cardiology/American Heart Association Joint Committee on Clinical Practice Guidelines. Circulation. 2021; 143: e35–e71
22. Arbelo E, Protonotarios A, Gimeno JR, Arbustini E, Barriales-Villa R, Basso C, Bezzina CR,et al ; ESC Scientific Document Group. [2023 ESC Guidelines for the management of cardiomyopathies.](https://pubmed.ncbi.nlm.nih.gov/37622657/) Eur Heart J. 2023 Oct 1;44(37):3503-3626. doi: 10.1093/eurheartj/ehad194.
23. Könemann H, Dagres N, Merino JL, Sticherling C, Zeppenfeld K, Tfelt-Hansen J, Eckardt L. [Spotlight on the 2022 ESC guideline management of ventricular arrhythmias and prevention of sudden cardiac death: 10 novel key aspects.](https://pubmed.ncbi.nlm.nih.gov/37102266/) Europace. 2023 May 19;25(5):euad091. doi: 10.1093/europace/euad091.
