# Supplementary material for: Study protocol for an international prospective non-randomized trial evaluating the long term outcomes of Sutureless Aortic Valve Replacement Versus Stented Aortic Valve Replacement for Aortic-Valve Stenosis in Patients at Risk to Severe Valve Obstruction: The SAVI-AVR trial
Source: Research Square preprint supplement (doi:10.21203/rs.3.rs-6251208/v1), 2025-05-08
Supplement: Supplementary file 8 [file 87230b75c6511066d6164472.docx]

| **Table 4. Secondary Endpoints** |
| --- |
| **DEVICE** |
| - For the technical success at time of exit from the operating room (OR) or cardiac catheterisation laboratory, the following criteria must be met: - The patient must be alive. - The device is correctly positioned, with this being of particular importance in the case of TAVI, where repositioning and recapture may be necessary. - Access, delivery and retrieval of the device must be successful. - No further unplanned or emergency surgical procedures or re-interventions are conducted prior to the patient's departure from the operating room (OR) or cardiac catheterisation laboratory, specifically in relation to the implanted device or the access procedure. This includes the requirement for readmission for additional weaning procedures. |
| - The success of the device at the 30-day mark is defined by the fulfillment of the following criteria: - The patient is alive and free of any stroke-related complications. - The original intended device has been successfully implanted. - No supplementary surgical or interventional procedures related to access or the device have been performed since the original procedure was completed. That is to say, the patient was discharged from the cardiac catheterisation laboratory/operating room. - The intended performance of the device is as follows: - Structural performance: no migration, embolisation, detachment, fracture, or thrombosis. - Haemodynamic performance: mean gradient < 20 mmHg, AVA > 1 cm², jet velocity < 3.0 m/s. - Absence of the following paracardiac complications: PVL > mild, erosion, hemolysis, or endocarditis. |
| - The following criteria are to be met in order for the procedure to be considered successful at the 30-day mark: - Device Success - No device- or procedure-related SAVI or TAVI were observed. - Prolonged intubation > 48 hours - Life-threatening bleeds (BARC 3b or greater) were not observed. - Major vascular or cardiac structural complications requiring unplanned reintervention or surgery were not observed. - Stage 2 or 3 AKI (including new dialysis) was not observed. - Myocardial infarction or need for PCI/CABG - Severe heart failure or hypotension requiring intravenous inotrope >12 hours, ultrafiltration or mechanical circulatory support - Necessity for the permanent implant of a pacemaker, or for the continuous management of new-onset atrial fibrillation. |
| - Patient success at 1, 5 and 10 years. The following criteria will be used to define success of device implantation: - Return to the prior living condition (or a comparable one). - No further hospitalisation or re-intervention for the underlying condition (e.g. aortic stenosis and heart failure) is required. - There must be improvement in symptoms, as defined by a >1 increase in NYHA class in comparison to the baseline. - Improvement in quality of life, as defined by an increase in KCCQ score >10 in comparison to the baseline. - Improvement in functional status, as defined by an increase in 6MWT >25 m in comparison to the baseline. |
| - The attainment of late device success was defined as the fulfilment of all of the following criteria at all subsequent follow-up timepoints after 30 days: - The patient is alive and free of any stroke-related complications. - The original device has been successfully implanted. - The structural integrity of the device is defined as the absence of migration, embolisation, detachment, fracture, or thrombosis. - No additional surgical or interventional procedures related to the device have been performed since the patient's discharged from hospital. - The haemodynamic performance of the device is defined as follows: - A mean aortic valve gradient of less than 20 mmHg - An AVA of more than 1 cm2 - The absence of the following paracardiac complications: - Endocarditis - PVL of greater than mild - The need for a PPM to maintain a viable heart rate or rhythm - Hemolysis - Erosion |
| **PATIENTS** |
| - **30 days** - Myocardial infarction - The patient exhibited coronary obstruction, necessitating intervention - The occurrence of bleeding complications, which may be life-threatening, disabling, or of a significant nature - Acute kidney injury - Vascular complications of a major nature occurred - 6-minute walk test - The health status of the subject was assessed by means of Quality of Life questionnaires. - KCCQ - EQ-5D-5L - SF-36 - The following indices are to be considered: - the number of days spent in hospital - the number of days spent in intensive care - the location of discharge |
| - **30 days, 1 , 5 years and 10 year.** - The number of days alive and not hospitalized - The impact of stroke, categorised as either disabling or non-disabling, is measured at three distinct time points - The incidence of mortality or subsequent cerebrovascular accident is to be examined in relation to the timeframe - New York Heart Association class - The rehospitalisation rate for symptoms associated with aortic stenosis, as well as for complications arising from the valve implant intervention, is to be monitored at 30 days and on an annual basis. - The incidence of new-onset atrial fibrillation has been observed to occur in relation to the timeframe |

Abbreviation is shown in the text.
