# Supplementary material for: Study protocol for an international prospective non-randomized trial evaluating the long term outcomes of Sutureless Aortic Valve Replacement Versus Stented Aortic Valve Replacement for Aortic-Valve Stenosis in Patients at Risk to Severe Valve Obstruction: The SAVI-AVR trial
Source: Research Square preprint supplement (doi:10.21203/rs.3.rs-6251208/v1), 2025-05-08
Supplement: Supplementary file 9 [file 8b7d75b9442f0df030fbae0f.docx]

| **Table 9. Potential risk** |
| --- |
| - **Potential risks linked with anesthesia and interventional procedures** - Anemia - Angina - Myocardial infarction - Arrhythmia - Hypertension or hypotension - Heart murmur - Renal insufficiency or renal failure - Respiratory insufficiency or respiratory failure - Pulmonary edema - Heart failure - Stroke/transient ischemic attack, clusters or neurological deficit - Syncope - Death - Hematoma - Bleeding - Retroperitoneal bleed - Hemorrhage requiring transfusion or intervention - Pericardial effusion or cardiac tamponade - Pleural effusion - Fever - Inflammation - Pain or changes at the access site - Infection including septicemia and endocarditis - Possibility of experiencing an allergic reaction to anaesthesia, contrast media or device materials - There may be instances where cardiovascular injury, including perforation or dissection of vessels, ventricles, myocardiums or valvular structures, may require intervention. - Case of a conduction system injury (perhaps a defect) which could possibly require a permanent pacemaker. - Embolisation may be the cause, and this could include air, calcific/thrombotic valve material, or thrombus. - Restenosis - Reoperation |
| - **Potential risks may be associated with the use of the THV, Commander Delivery System and/or accessories.** - Coronary flow obstruction/transvalvular flow disturbance - Cardiac failure or low cardiac output - Cardiogenic shock - Cardiac arrest - Device migration or malposition requiring intervention - Emergency cardiac surgery - Device embolization - Hemolysis - Device thrombosis requiring intervention - Device explants - Device degeneration - Nonstructural dysfunction - Paravalvular or transvalvular leak - Non-emergent reoperation - Structural valve deterioration (wear, fracture, calcification, leaflet tear/tearing - from the stent posts, leaflet retraction, suture line disruption of components of - a prosthetic valve, thickening, stenosis) **(online supplemental material S1)** - Valve regurgitation - Valve thrombosis - Valve stenosis - Mechanical failure of delivery system, and/or accessories |
