# Supplementary material for: Study protocol for an international prospective non-randomized trial evaluating the long term outcomes of Sutureless Aortic Valve Replacement Versus Stented Aortic Valve Replacement for Aortic-Valve Stenosis in Patients at Risk to Severe Valve Obstruction: The SAVI-AVR trial
Source: Research Square preprint supplement (doi:10.21203/rs.3.rs-6251208/v1), 2025-05-08
Supplement: Supplementary file 10 [file 8e36a52a579d82edc3d8125e.docx]

| **Supplementary Table 1 New York Heart Association (NYHA) Classification** | |
| --- | --- |
| **Class** | **Patient Symptoms** |
| Class I (Asymptomatic) | No restrictions are imposed on physical activity. Ordinary physical exertion should not result in undue fatigue, palpitations, or dyspnea. |
| Class II (Mild) | The individual experiences slight limitations in physical activity and reports fatigue, palpitation and/or dyspnea on physical exertion. They are comfortable at rest, but become tired easily. |
| Class III (Moderate) | The patient exhibits a substantial decline in physical activity levels. While they may feel comfortable at rest, any activity beyond the ordinary level leads to fatigue, palpitations, or difficulty breathing. |
| Class IV (Severe) | Any physical activity makes the discomfort worse. The person has symptoms of heart failure even at rest. |
