# Supplementary material for: Study protocol for an international prospective non-randomized trial evaluating the long term outcomes of Sutureless Aortic Valve Replacement Versus Stented Aortic Valve Replacement for Aortic-Valve Stenosis in Patients at Risk to Severe Valve Obstruction: The SAVI-AVR trial
Source: Research Square preprint supplement (doi:10.21203/rs.3.rs-6251208/v1), 2025-05-08
Supplement: Supplementary file 11 [file 8e7f5fd31d8e8dec8420627a.docx]

| **Table 3 Study entry criteria** |
| --- |
| - **Inclusion criteria** - The patient has an operative mortality risk of less than 2% (e.g. STS <4), as determined by the cardiac team. Risk calculators such as the STS must be used in the cardiac team's assessment, along with overall clinical status and comorbid conditions that are not fully addressed by the STS risk score. These elements must be carefully considered during the case review process**.** - The study participant has received exhaustive information regarding the objectives of the study, consented to its provisions, and provided written informed consent, as stipulated by the Institutional Review Board (IRB) of the respective clinical site |
| - **Exclusion Criteria** - The patient has communicated a refusal to undergo a SAVR intervention. - At least 25% of patients must display symptoms of frailty, although no more than 0.25 of those who are deemed to be frail may be enrolled in the trial. - Detection of a rise and/or fall of cardiac biomarker values [preferably cardiac troponin (cTn)] with at least one value above the 99th percentile upper reference limit (URL) and with at least one of the following: - Presentation of symptoms indicative of myocardial ischemia - Observation of new or presumed new significant ST-segment–T wave (ST–T) changes or new left bundle branch block (LBBB) on electrocardiography (ECG) - Development of pathological Q waves on ECG - Presence of imaging evidence of new loss of viable myocardium or new regional wall motion abnormality - Identification of an intracoronary thrombus by angiography - The following are exclusionary: any invasive cardiac procedure performed within 30 days of valve implantation and PCI performed within two weeks before valve implantation or implanting a permanent pacemaker or ICD. - The presence of active bacterial endocarditis within 180 days following the valve implant procedure is documented. - Renal insufficiency, defined as an eGFR of less than 40 ml/min according to the Cockcroft-Gault formula, and/or the presence of renal replacement therapy at the time of screening, are documented. - Chronic liver disease (MELD Score ≥ 10 or Child-Pugh Class B or C) - Severe lung disease (FEV1 < 50% predicted) or currently on home oxygen - The presence of an intracardiac mass, thrombus, or vegetation is indicated by cardiac imaging (echocardiogram, computed tomography, and/or magnetic resonance imaging) findings. - The necessity of any planned surgical or peripheral procedure to be performed within the 30-day follow-up period following valve implantation is to be determined. - A series of emergency interventional and surgical procedures were performed within 30 days of the valve implantation procedure. - The patient has indicated a refusal to receive blood products. - If there is an absolute contraindication to the administration of iodinated contrast, or if there is an allergy to it that cannot be premedicated. |

Abbreviation is shown in the text.
