# Supplementary material for: Study protocol for an international prospective non-randomized trial evaluating the long term outcomes of Sutureless Aortic Valve Replacement Versus Stented Aortic Valve Replacement for Aortic-Valve Stenosis in Patients at Risk to Severe Valve Obstruction: The SAVI-AVR trial
Source: Research Square preprint supplement (doi:10.21203/rs.3.rs-6251208/v1), 2025-05-08
Supplement: Supplementary file 14 [file d0fd0924cf8c7b6f40620131.docx]

| **Table 6** Timing and advice for patients who are suitable for SAVR or TAVRχ | |
| --- | --- |
| **ACC/AHA RECOMMENDATIONS** | |
| **COR 1 LOE A** | In adults exhibiting severe high-gradient AVS (Stage D1) and symptoms of exertional dyspnea, HF, angina, syncope, or presyncope, as indicated by a medical history or exercise testing results, AVR is recommended as a therapeutic intervention. |
| **COR 1 LOE A** | For patients suffering from severe AVS and who meet all the following criteria, the procedure is recommended: patients under the age of 65 or with a life expectancy above 20 years and for whom there is an indication for aortic AVR. |
| **COR 1 LOE A** | In circumstances where patients are suffering from severe AVS and fulfil all of the subsequent criteria, it is recommended to undertake a procedure. The following criteria are to be considered: patients under the age of 65, or with a life expectancy above 20 years, and for whom an indication for aortic AVR exists. |
| **COR 1 LOE A** | For patients over 80 years of age who have been diagnosed with severe aortic stenosis or who have a lifespan of less than 10 years and no anatomical contraindications, TAVR is recommended over SAVR. |
| **COR 1 LOE A** | For patients with an indication for AVR for whom a bioprosthetic valve is preferred, but for whom transfemoral TAVR is not suitable, SAVR is recommended. |
| **COR 1 LOE A** | For patients of all ages with AVS where surgery is high risk, TAVR is recommended if the survival post-TAVR is >12 months and the quality of life is expected to be good. |
| **ESC RECOMMENDATIONS** | |
| **COR 1 LOE B** | In the event of symptomatic patients suffering from severe, high-gradient aortic stenosis, with a mean gradient of greater than 40 mmHg, peak velocity of greater than 4.0 m/s, and valve area of less than 1.0 cm² (or less than 0.6 cm²/m²), intervention is recommended. |
| **COR 1 LOE B** | In the presence of symptoms, patients with severe low-flow aortic stenosis (SV < 35 mL/m²) and low-gradient (<40 mmHg) aortic stenosis with reduced ejection fraction (<50%), along with evidence of flow (contractile) reserve, are recommended to be referred for intervention. |
| **COR 1 LOE A** | TAVR is recommended for older patients (aged >75 years) or those considered to be high risk (STS-PROM/EuroSCORE IIf >8%) or for patients deemed unsuitable for surgery**.** |

Abbreviations; AVR, aortic valve replacement; AVS, aortic valve stenosis ; HF; heart failure; TAVR, transcatheter aortic valve replacement; SAVR; surgical aortic valve replacement; STS, Society of Thoracic Surgeon

χ.The recommendations under discussion are supported by Class of Recommendation (COR) I and Level of Evidence (LOE) A. The latter is the highest level of recommendation available, and implies both substantial safety and efficacy of the procedure [2,3]. Abbreviations; see text
