# Supplementary material for: Study protocol for an international prospective non-randomized trial evaluating the long term outcomes of Sutureless Aortic Valve Replacement Versus Stented Aortic Valve Replacement for Aortic-Valve Stenosis in Patients at Risk to Severe Valve Obstruction: The SAVI-AVR trial
Source: Research Square preprint supplement (doi:10.21203/rs.3.rs-6251208/v1), 2025-05-08
Supplement: Supplementary file 15 [file e54150674ebfd0550ced8f44.docx]

| **Table 5 Recommended anticoagulation/antithrombotic regimen for SuAVI and StAVR** | |
| --- | --- |
| **Drive access** | Sternotomy or mini-sternotomy |
| **Anesthesia** | General |
| **The following protocol is to be observed prior to the implantation of the valve** | |
|  | The recommended daily dosage of acetylsalicylic acid is between 81 and 100 milligrams. |
|  | - BMS patients within one month or those with a DES within 12 months should continue their Clopidogrel/prasugrel therapy before their implant. - Patients with AF prescribed warfarin should undergo bridging with LMWH or UFH before an implant. - TEE is not mandatory for patients with atrial fibrillation before an implant. If TEE during AVR reveals a clot, the procedure will be aborted and delayed until the patient has been on warfarin or dabigatran for at least 30 days. For surgical patients with LA clot as revealed by TEE, the implant procedure may proceed as standard. |
| **The following protocol is to be observed intraprocedural.** | |
|  | Heparin will be given to achieve or maintain an ACT greater than 250 seconds. |
| **The following protocol is to be observed post valve implant procedure** | |
| **Category I**  **for Stroke**  **Risk**  No atrial  fibrillation,  No recent  stents | - ASA 81mg qd   Clopidogrel 75 mg was initiated within 24 hours of surgery for one month, contingent on its clinical safety and the surgical team's discretion. Clopidogrel is contraindicated in centres using warfarin post-surgical AVR anti-coagulation . |
| **Category II**  **for Stroke**  **Risk**  No atrial  fibrillation,  recent  stents | - ASA 81mg qd - Discontinue clopidogrel before surgery in cases of BMS within one month or DES within 12 months. - Clopidogrel 75 mg was given 24 hours after surgery if appropriate, for at least one month after SAVR in patients with BMS and 12 months in those with DES. |
| **Category III**  **for Stroke**  **Risk**  Atrial  fibrillation,  No recent  stents | - ASA 81mg qd - If appropriate, patients should be initiated on warfarin or dabigatran 24 hours after PCI, continuing for a minimum of one month or until their condition stabilises. If the patient's condition permits, warfarin therapy should be preceded by a bridging phase of unfractionated or LMWH until the INR reaches a therapeutic level. - If patients are deemed unsuitable for warfarin or dabigatran, an alternative is Clopidogrel 75 mg once-daily (in addition to ASA 81 mg). |

Abbreviations; AF, atrial fibrillation; ASA, aspirin; BMS, bar metal stent; DES, drug-eluting stent; INR, International Normalised Ratio; LA, left atrium; LMWH, low-molecular weight heparin; UFN, unfractionated heparin; other abbreviations in the text
